# Supplementary material for: A coaxial three-layer (Ni, Fe)OxHy/Ni/Cu mesh electrode: excellent oxygen evolution reaction activity for water electrolysis
Source: Royal Society of Chemistry journal article supplement (doi:10.1039/c9cy02328c), 2019-12-27
Supplement: c9cy02328c1.pdf [file c9cy02328c1.pdf]

# **A Coaxial Three-layer (Ni,Fe)O<sub>x</sub>H<sub>y</sub>/Ni/Cu Mesh Electrode: Excellent Oxygen Evolution Reaction Activity for Water Electrolysis**

Jizuo Zhao,<sup>a</sup> Weibing Wu,<sup>\*a</sup> Xiangyu Jia,<sup>a</sup> Zhenlu Zhao<sup>\*a</sup> and Xun Hu<sup>a</sup>

<sup>a</sup> School of Materials Science and Engineering, University of Jinan, Jinan, 250022, Shandong, China

\*Corresponding author E-mail: mse\_wuwb@ujn.edu.cn (Weibing Wu), mse\_zhaozl@ujn.edu.cn (Zhenlu Zhao)

## Supplementary Figures

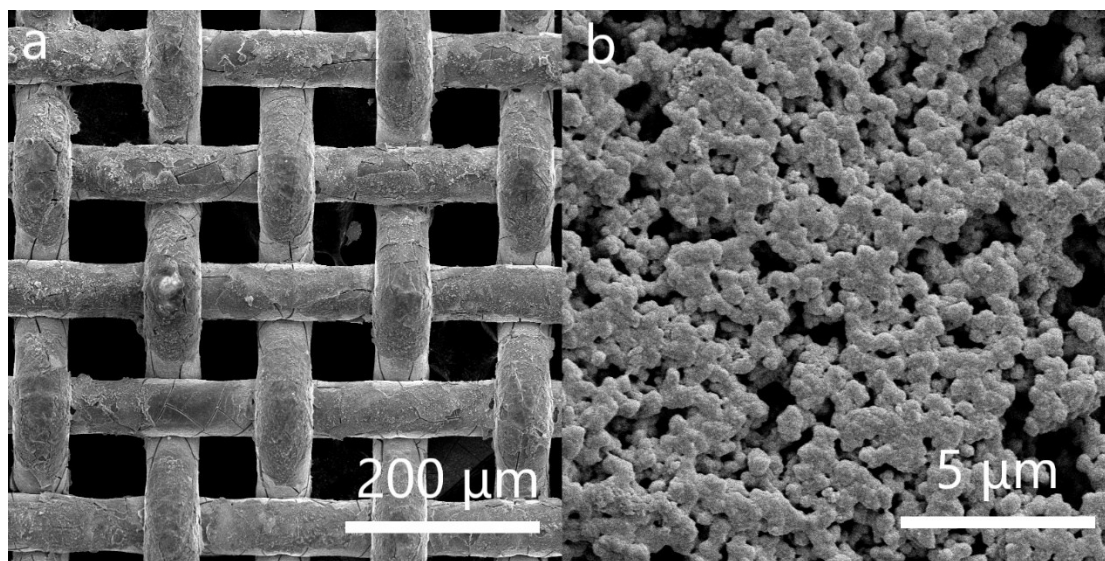

Figure S1. Scanning electron microscopy (SEM) images of the  $(\text{Ni,Fe})\text{O}_x\text{H}_y/\text{Ni}/\text{Cu}$  mesh electrode after long-term stability test with the scale bars of (a) 200  $\mu\text{m}$  and (b) 5  $\mu\text{m}$ .

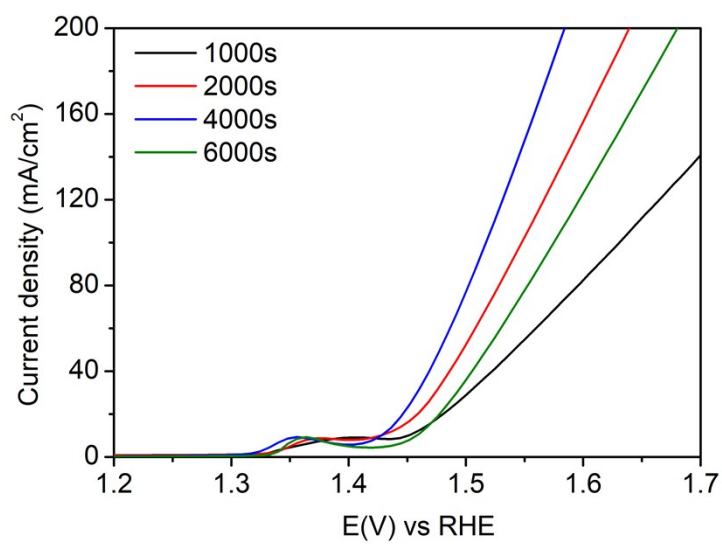

Figure S2. OER polarization curves obtained from samples of different Ni plating time in 1.0 M KOH solution at a scan rate of 1 mV/s.

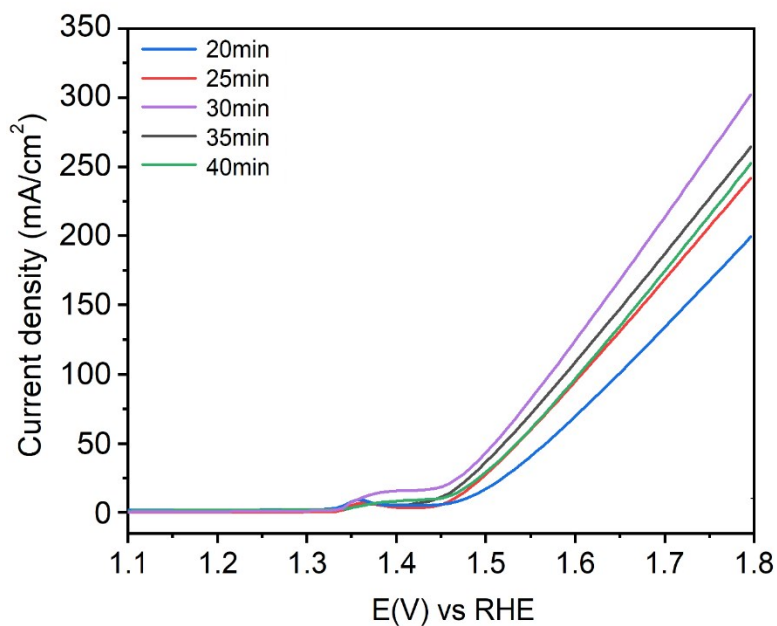

Figure S3. OER polarization curves obtained from samples of different (Ni,Fe)O<sub>x</sub>H<sub>y</sub> catalyst time in 1.0 M KOH solution at a scan rate of 1 mV/s.

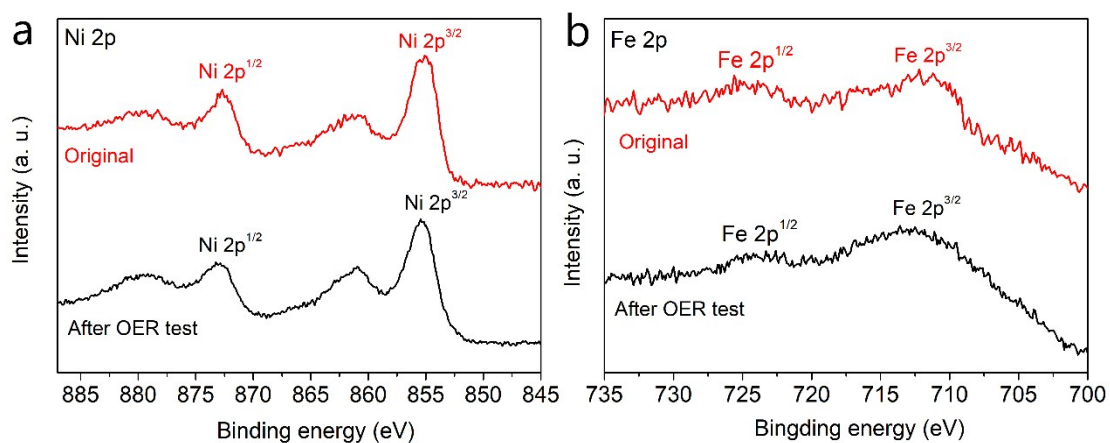

Figure S4. (a) Ni 2p XPS spectra of the (Ni,Fe)O<sub>x</sub>H<sub>y</sub> catalyst before and after OER test. (b) Fe 2p XPS spectra of the (Ni,Fe)O<sub>x</sub>H<sub>y</sub> catalyst before and after OER test.

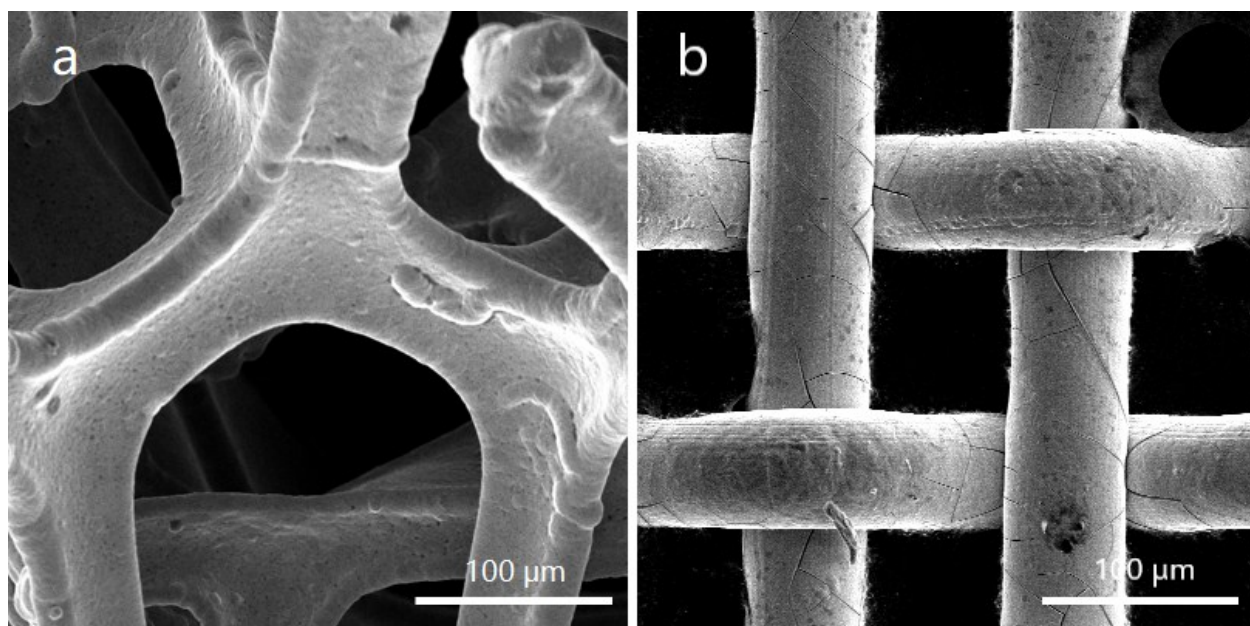

Figure S5. SEM images of (a) Ni foam and (b) Ni-plated Cu mesh.

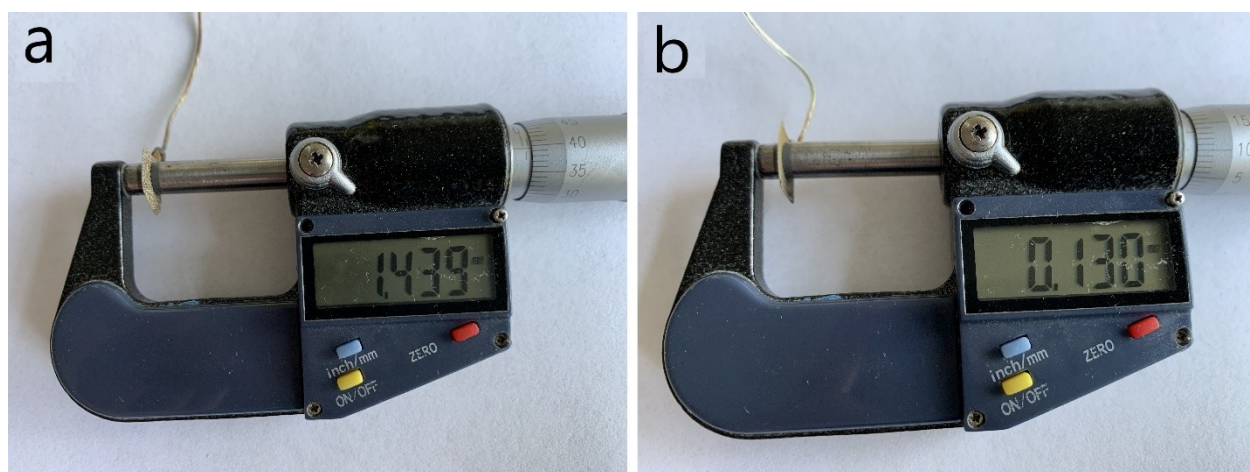

Figure S6. Thickness measured by vernier caliper of (a) Ni foam electrode and (b) Ni-plated Cu mesh electrode.

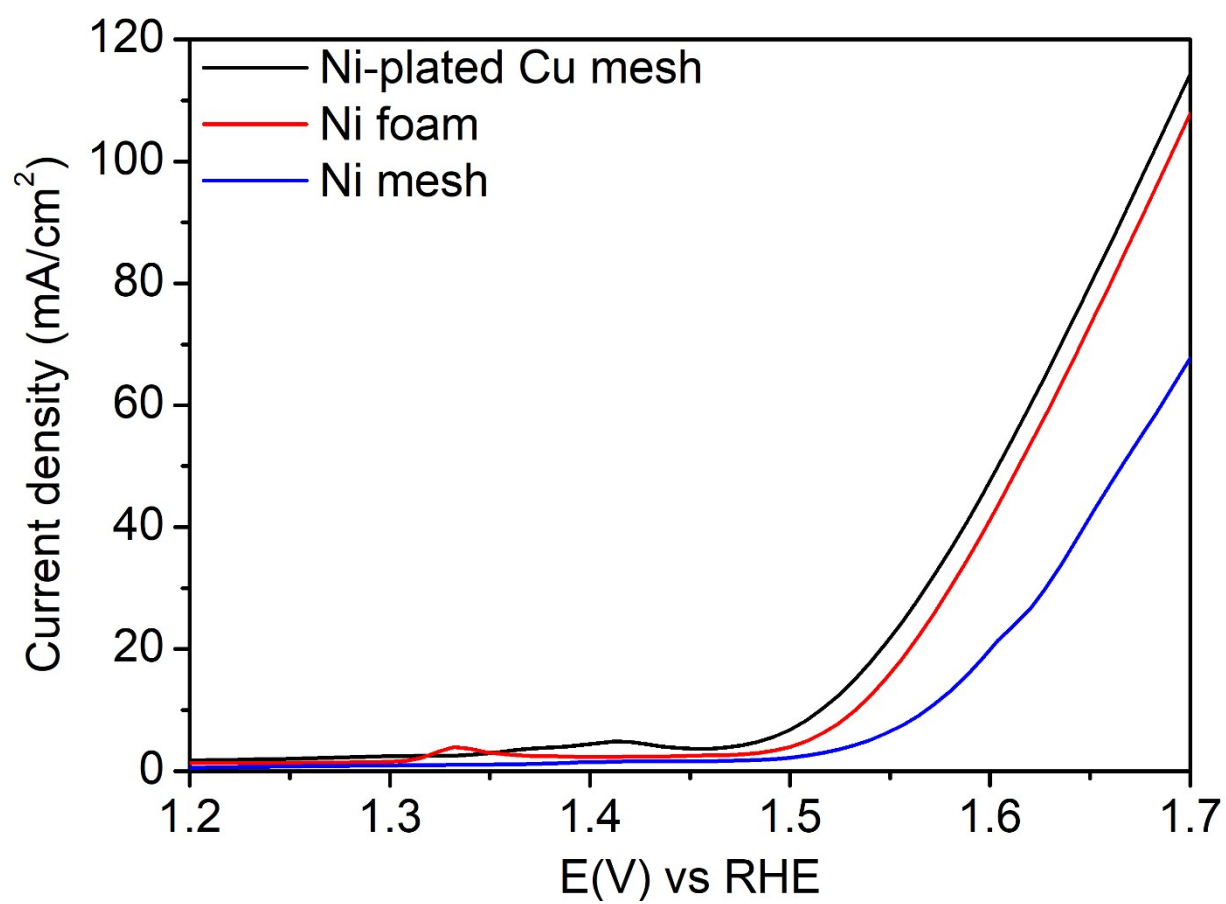

Figure S7. OER polarization curves obtained from bare Ni-plated Cu mesh, Ni foam and Ni mesh in 1.0 M KOH solution at a scan rate of 1 mV/s.

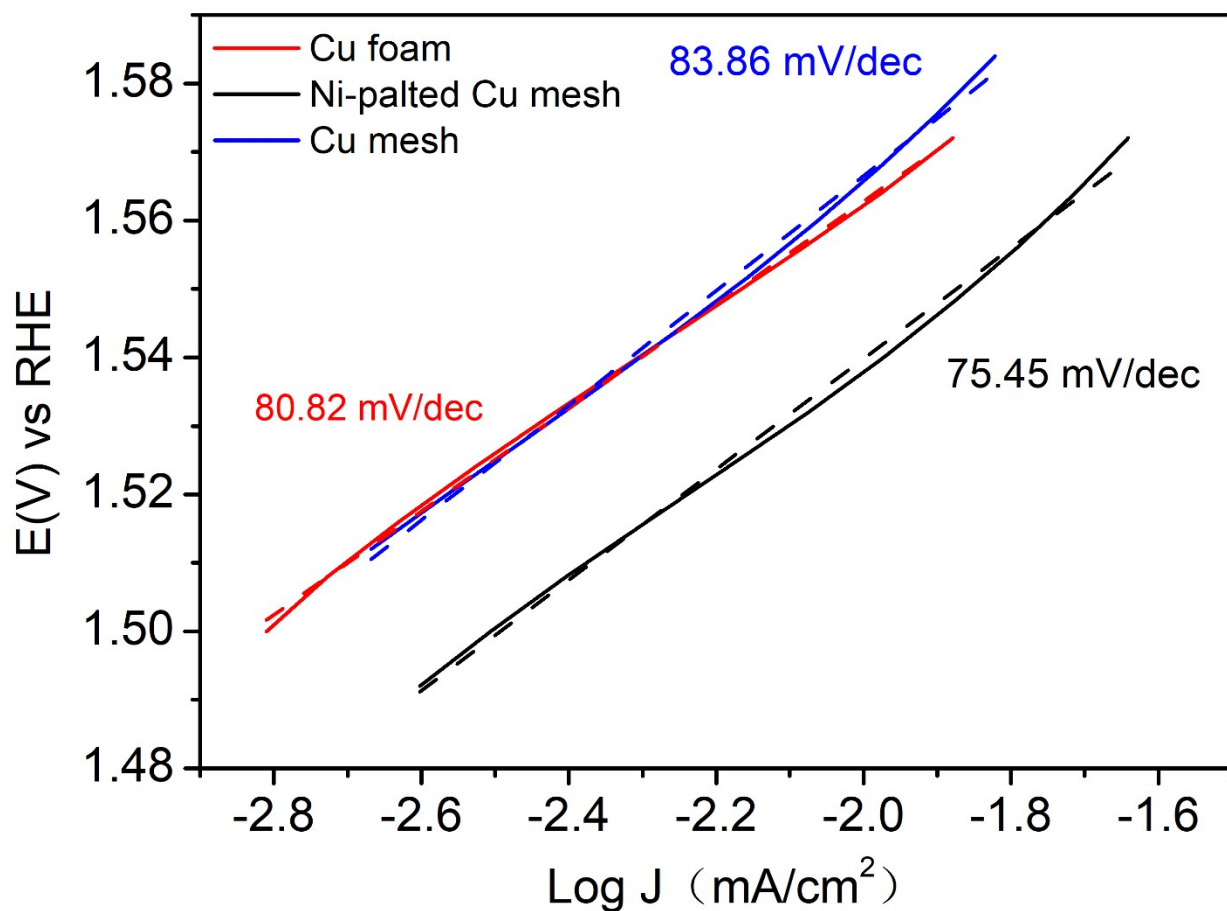

Figure S8. Tafel slopes of the bare Ni-plated Cu mesh, Ni foam and Ni mesh.

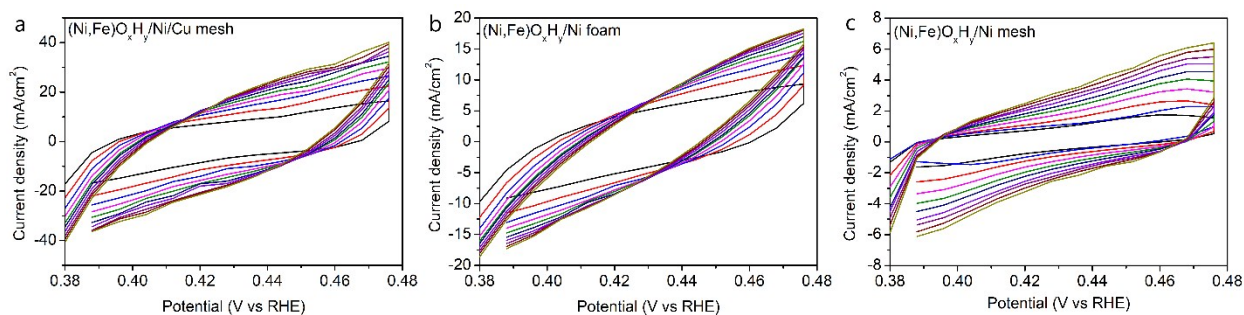

Figure S9. Typical cyclic voltammetry curves at the scan rates from 10 mV/s to 100 mV/s with a 10 mV/s interval for  $(\text{Ni},\text{Fe})\text{O}_x\text{H}_y$  catalyst deposited on (a) Ni-plated Cu mesh, (b) Ni foam, and (c) Ni mesh.

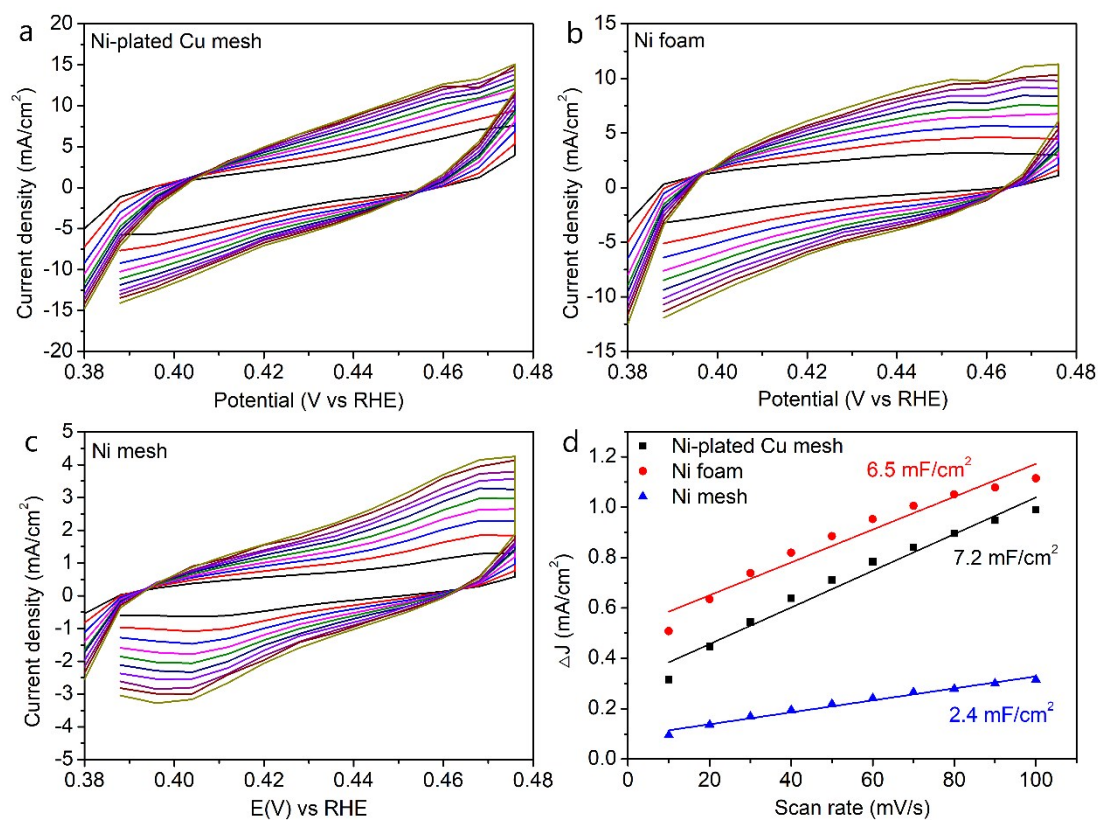

Figure S10. Typical cyclic voltammetry curves at the scan rates from 10  $\text{mV}/\text{s}$  to 100  $\text{mV}/\text{s}$  with a 10  $\text{mV}/\text{s}$  interval for the electrodes of (a)  $(\text{Ni,Fe})\text{O}_x\text{H}_y/\text{Ni}/\text{Cu}$  mesh, (b)  $(\text{Ni,Fe})\text{O}_x\text{H}_y/\text{Ni}$  foam and (c)  $(\text{Ni,Fe})\text{O}_x\text{H}_y/\text{Ni}$  mesh at the scanning potential range from 0.38 V to 0.48 V vs RHE. (d) Capacitive  $\Delta J$  ( $= J_a - J_c$ ) versus the scan rates of the three substrates.

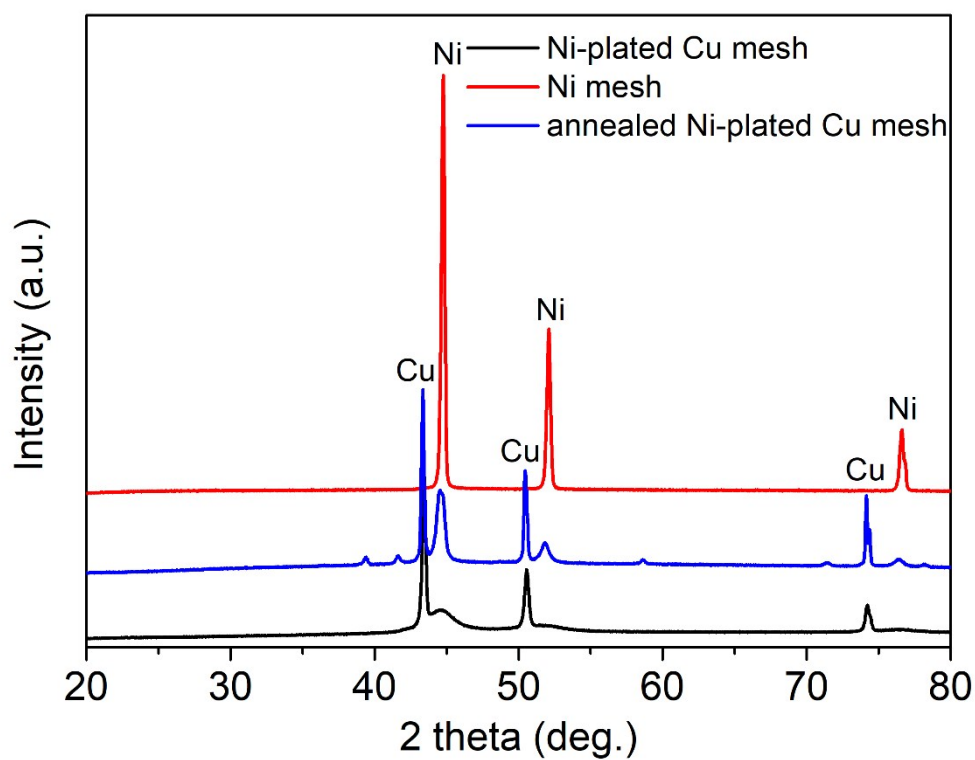

Figure S11. XRD patterns of (a) Ni-plated Cu mesh, (b) Ni mesh and (c) annealed Ni-plated Cu mesh.

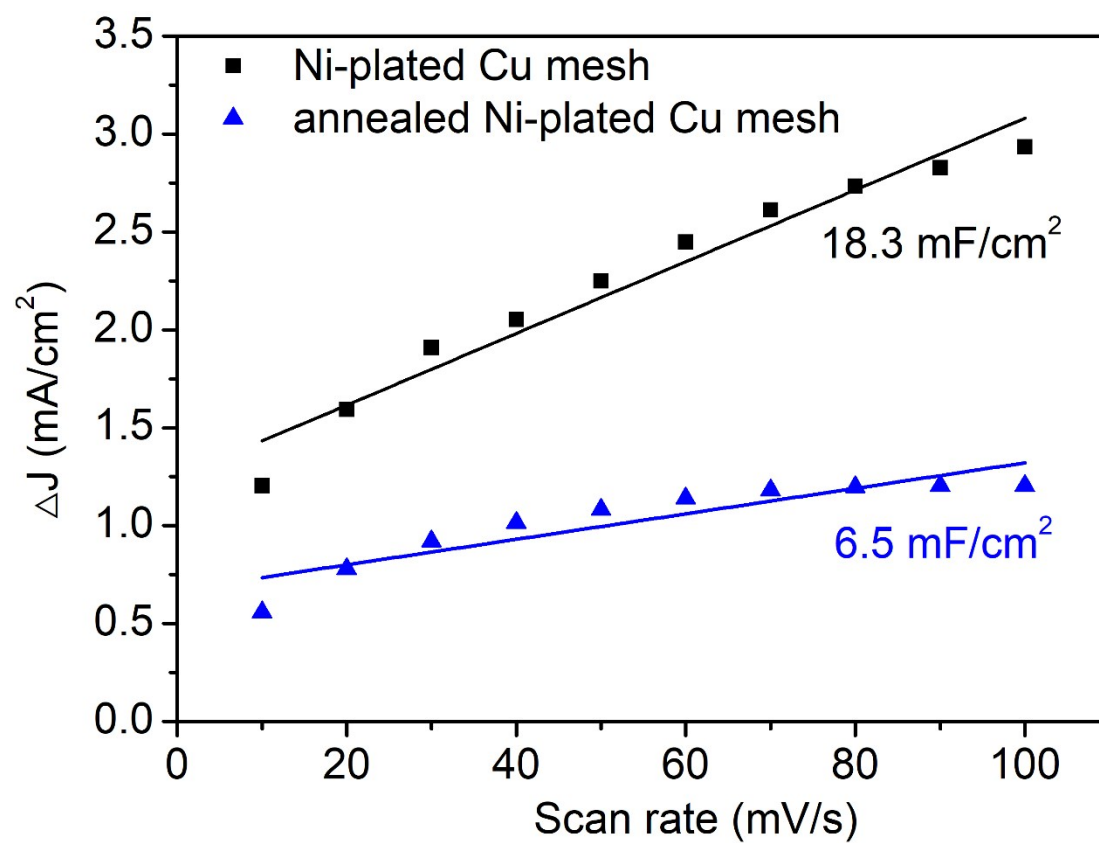

Figure S12. Capacitive  $\Delta J$  ( $= J_a - J_c$ ) versus the scan rates of  $(\text{Ni,Fe})\text{O}_x\text{H}_y$  catalyst deposited on Ni-plated Cu mesh and annealed Ni-plated Cu mesh.

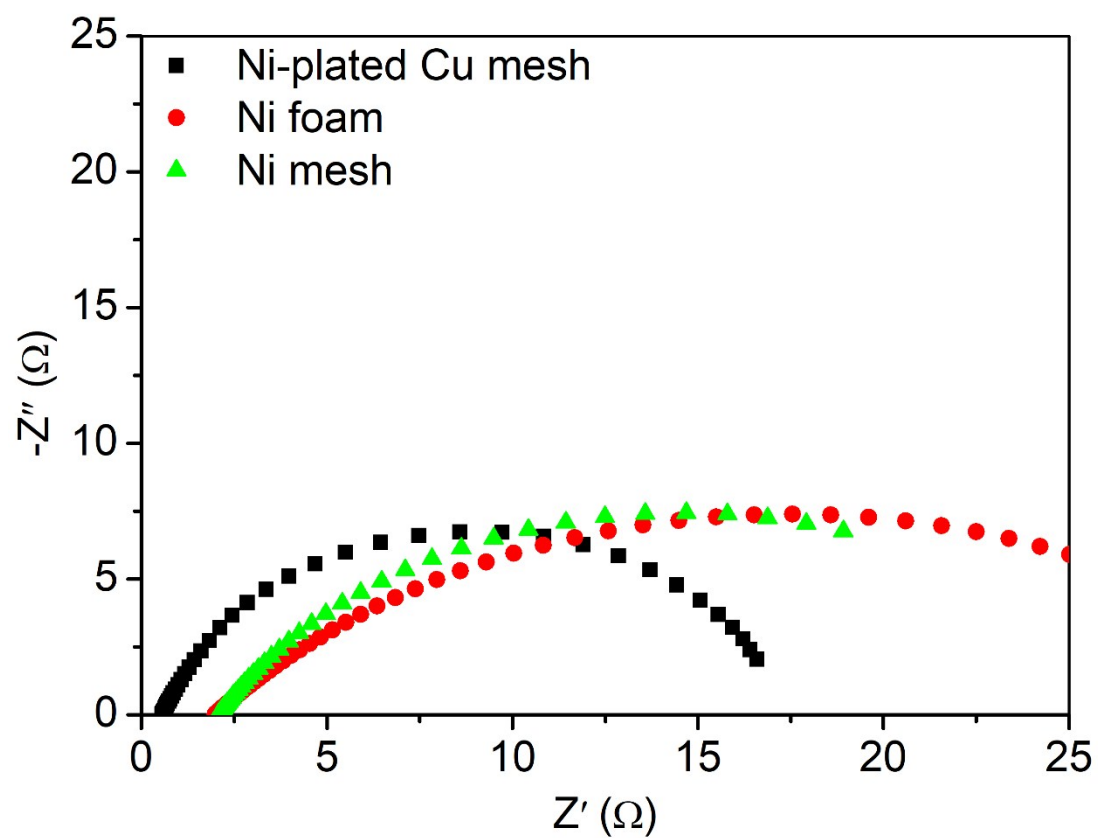

Figure S13. Fitted electrochemical impedance spectra of the three substrates.
